# Supplementary material
Source: PubMed Central journal article supplement (PMC5084906)
Supplement: NIHMS784781-supplement-Table_S1.pdf [file NIHMS784781-supplement-Table_S1.pdf]

**Table S1.** Values of NSpC × TGA for all proteins found in proteomics analysis.

| Proteins                                                            | MW (kDa) | Porous (nm) |             |             | Dense (nm)  |             |             |
|---------------------------------------------------------------------|----------|-------------|-------------|-------------|-------------|-------------|-------------|
|                                                                     |          | 70          | 850         | 85          | 250         | 500         | 900         |
| Apolipoprotein C-III                                                | 11       | 0±0         | 0±0         | 0±0         | 0±0         | 0±0         | 0.058±0.069 |
| Apolipoprotein C-II                                                 | 11.1     | 0.118±0.108 | 0±0         | 0±0         | 0±0         | 0±0         | 0±0         |
| Apolipoprotein A-II                                                 | 11.2     | 1.866±0.169 | 0.561±0.132 | 1.48±0.25   | 0.863±0.078 | 0.493±0.025 | 0.401±0.039 |
| Uncharacterized protein                                             | 12.9     | 0.101±0.093 | 0±0         | 0±0         | 0±0         | 0±0         | 0±0         |
| Beta-2-microglobulin                                                | 13.7     | 0.239±0.151 | 0.042±0.052 | 0±0         | 0±0         | 0±0         | 0±0         |
| Hemoglobin subunit alpha                                            | 15.2     | 1.333±0.168 | 0.414±0.161 | 0.485±0.07  | 0.225±0.052 | 0.264±0.065 | 0.254±0.021 |
| Transferrin                                                         | 15.7     | 0.083±0.145 | 0.182±0.069 | 0.117±0.011 | 0.108±0.025 | 0.096±0.012 | 0.061±0.008 |
| Hemoglobin fetal subunit beta                                       | 15.8     | 1.894±0.412 | 0.504±0.098 | 1.2±0.178   | 0.394±0.016 | 0.348±0.018 | 0.324±0.029 |
| Hemoglobin subunit beta                                             | 16       | 0±0         | 0.178±0.034 | 0.23±0.077  | 0.142±0.014 | 0.157±0.059 | 0.16±0.035  |
| Cystatin-C                                                          | 16.3     | 0.201±0.128 | 0±0         | 0±0         | 0±0         | 0±0         | 0±0         |
| Insulin-like growth factor II                                       | 19.7     | 0.033±0.03  | 0±0         | 0±0         | 0±0         | 0±0         | 0±0         |
| Apolipoprotein D                                                    | 21       | 0±0         | 0±0         | 0.088±0.064 | 0±0         | 0±0         | 0±0         |
| Tetranectin                                                         | 22.1     | 0.118±0.108 | 0.103±0.026 | 0.111±0.079 | 0.18±0.063  | 0.091±0.022 | 0.101±0.007 |
| Transgelin-2                                                        | 22.4     | 0.029±0.027 | 0±0         | 0±0         | 0±0         | 0±0         | 0±0         |
| Insulin-like growth factor-binding protein 6                        | 24.9     | 0.052±0.053 | 0±0         | 0±0         | 0±0         | 0±0         | 0±0         |
| C1QTNF3 protein                                                     | 26.8     | 0.049±0.085 | 0±0         | 0±0         | 0±0         | 0±0         | 0±0         |
| Complement factor D                                                 | 27.9     | 0.023±0.021 | 0±0         | 0±0         | 0±0         | 0±0         | 0±0         |
| Apolipoprotein A-I                                                  | 30.3     | 0.863±0.329 | 0.491±0.157 | 0.913±0.059 | 0.826±0.113 | 0.315±0.126 | 0.191±0.023 |
| Osteopontin                                                         | 30.7     | 0.021±0.047 | 0±0         | 0±0         | 0±0         | 0±0         | 0±0         |
| Insulin-like growth factor-binding protein 2                        | 30.9     | 0.021±0.019 | 0.092±0.018 | 0.139±0.035 | 0.166±0.076 | 0.13±0.012  | 0.125±0.068 |
| Uncharacterized protein                                             | 31       | 0±0         | 0.037±0.05  | 0±0         | 0.037±0.026 | 0.032±0.024 | 0.021±0.024 |
| Isoform 2 of N-acetylglucosamine-1-phosphotransferase subunit gamma | 31.4     | 0.042±0.072 | 0±0         | 0±0         | 0±0         | 0±0         | 0±0         |
| Insulin-like growth factor-binding protein 3                        | 31.5     | 0.041±0.072 | 0±0         | 0±0         | 0±0         | 0±0         | 0±0         |
| Estrogen sulfotransferase                                           | 35       | 0±0         | 0±0         | 0.035±0.044 | 0±0         | 0±0         | 0±0         |
| Glyceraldehyde-3-phosphate dehydrogenase                            | 35.8     | 0.146±0.082 | 0.016±0.022 | 0.034±0.024 | 0.032±0.033 | 0.014±0.017 | 0.018±0.012 |
| Apolipoprotein E                                                    | 36.0     | 0.309±0.144 | 0.222±0.029 | 0.324±0.084 | 0.458±0.048 | 0.251±0.059 | 0.187±0.028 |
| L-lactate dehydrogenase B chain                                     | 36.7     | 0.018±0.016 | 0±0         | 0±0         | 0±0         | 0±0         | 0±0         |
| Beta-2-glycoprotein 1                                               | 38       | 0±0         | 0±0         | 0.032±0.048 | 0±0         | 0±0         | 0.008±0.01  |
| Alpha-2-HS-glycoprotein                                             | 38.4     | 2.04±0.636  | 0.208±0.033 | 0.352±0.012 | 0.222±0.036 | 0.131±0.036 | 0.15±0.006  |
| Protein AMBP                                                        | 39.3     | 0.033±0.058 | 0±0         | 0±0         | 0±0         | 0±0         | 0±0         |
| Actin, cytoplasmic 1                                                | 41.8     | 0.14±0.1    | 0.082±0.035 | 0.205±0.018 | 0.014±0.014 | 0.036±0.026 | 0.031±0.024 |
| Apolipoprotein A-IV                                                 | 43       | 0±0         | 0.013±0.018 | 0±0         | 0±0         | 0±0         | 0±0         |
| Fetuin-B                                                            | 43       | 0±0         | 0±0         | 0.029±0.035 | 0.026±0.021 | 0.012±0.02  | 0.015±0.011 |
| Phosphoglycerate kinase 1                                           | 45       | 0±0         | 0±0         | 0.027±0.019 | 0.025±0.018 | 0.011±0.019 | 0.043±0.012 |
| Angiotensinogen                                                     | 45       | 0±0         | 0±0         | 0.068±0.03  | 0.013±0.023 | 0.011±0.015 | 0.007±0.008 |
| Plasma serine protease inhibitor                                    | 45.3     | 0.202±0.08  | 0.038±0.048 | 0.285±0.022 | 0.138±0.048 | 0.089±0.033 | 0.057±0.011 |
| Alpha-1-antitrypsin                                                 | 46.1     | 0.354±0.093 | 0.149±0.049 | 0.306±0.023 | 0.185±0.05  | 0.098±0.012 | 0.111±0.024 |
| Pigment epithelium-derived factor                                   | 46.2     | 0.509±0.149 | 0±0         | 0.584±0.045 | 0.283±0.091 | 0.076±0.051 | 0.069±0.028 |
| Serpin "A2-3"                                                       | 46.2     | 0.028±0.026 | 0±0         | 0±0         | 0±0         | 0±0         | 0±0         |
| Serpin H1                                                           | 46.5     | 0.014±0.013 | 0±0         | 0±0         | 0±0         | 0±0         | 0±0         |
| LOX protein                                                         | 47.0     | 0.014±0.024 | 0±0         | 0±0         | 0±0         | 0±0         | 0±0         |
| Elongation factor 1-alpha (Fragment)                                | 47.9     | 0.027±0.025 | 0±0         | 0.013±0.016 | 0.047±0.028 | 0.042±0.01  | 0.054±0.007 |
| Adenosylhomocysteinase                                              | 48       | 0±0         | 0.024±0.04  | 0.026±0.018 | 0±0         | 0±0         | 0.007±0.008 |

| Proteins                                        | MW (kDa) | Porous (nm) |             |             | Dense (nm)  |             |             |
|-------------------------------------------------|----------|-------------|-------------|-------------|-------------|-------------|-------------|
|                                                 |          | 70          | 850         | 85          | 250         | 500         | 900         |
| Procollagen C-<br>endopeptidase enhancer        | 48       | 0±0         | 0±0         | 0±0         | 0±0         | 0.01±0.015  | 0.073±0.013 |
| Fibrinogen gamma-B<br>chain                     | 50       | 0±0         | 0.046±0.012 | 0±0         | 0±0         | 0.01±0.014  | 0.006±0.008 |
| Adenylyl cyclase-<br>associated protein         | 51       | 0±0         | 0±0         | 0.024±0.017 | 0±0         | 0.01±0.014  | 0.025±0.012 |
| Integrin-linked protein<br>kinase               | 51.5     | 0.013±0.022 | 0±0         | 0±0         | 0±0         | 0±0         | 0±0         |
| SERPINA10 protein                               | 52.0     | 0.038±0.035 | 0±0         | 0±0         | 0±0         | 0±0         | 0±0         |
| Uncharacterized protein                         | 52       | 0±0         | 0±0         | 0.165±0.067 | 0.076±0.005 | 0.01±0.013  | 0.025±0.019 |
| Antithrombin-III                                | 52.4     | 0.062±0.102 | 0.163±0.049 | 0.082±0.021 | 0.152±0.025 | 0.105±0.027 | 0.104±0.022 |
| Fibrinogen beta chain                           | 53.3     | 0.012±0.011 | 0±0         | 0±0         | 0±0         | 0±0         | 0±0         |
| Vitamin D-binding protein                       | 53.3     | 0.147±0.027 | 0±0         | 0.023±0.016 | 0±0         | 0±0         | 0±0         |
| Alpha-1B-glycoprotein                           | 53.5     | 0.012±0.021 | 0±0         | 0±0         | 0±0         | 0±0         | 0±0         |
| Uncharacterized protein                         | 53.5     | 0.256±0.039 | 0.075±0.024 | 0.298±0.056 | 0.18±0.016  | 0.066±0.033 | 0.102±0.045 |
| Alpha-2-antiplasmin                             | 54.7     | 0.095±0.026 | 0.01±0.013  | 0.034±0.042 | 0.062±0.025 | 0.037±0.028 | 0.059±0.016 |
| SERPIND1 protein                                | 55.2     | 0.024±0.022 | 0.01±0.013  | 0.044±0.036 | 0.01±0.011  | 0±0         | 0.017±0.012 |
| ECM1 protein                                    | 57.6     | 0.011±0.01  | 0.03±0.004  | 0.021±0.015 | 0.03±0.007  | 0.026±0.003 | 0.022±0.004 |
| Pyruvate kinase                                 | 58       | 0±0         | 0.03±0.004  | 0±0         | 0.098±0.048 | 0.035±0.028 | 0.1±0.028   |
| Histidine-rich glycoprotein                     | 61       | 0±0         | 0±0         | 0.03±0.026  | 0.037±0.004 | 0.025±0.018 | 0.047±0.007 |
| Complement component<br>C9                      | 62       | 0±0         | 0±0         | 0.04±0.01   | 0.018±0.013 | 0±0         | 0±0         |
| Sulfhydryl oxidase                              | 63.0     | 0.021±0.019 | 0.018±0.014 | 0.039±0.04  | 0.099±0.024 | 0.056±0.027 | 0.143±0.013 |
| Uncharacterized protein<br>(Fragment)           | 63       | 0±0         | 0±0         | 0±0         | 0.009±0.009 | 0.008±0.011 | 0.015±0.011 |
| Uncharacterized protein<br>(Fragment)           | 65.8     | 0.02±0.035  | 0±0         | 0±0         | 0±0         | 0±0         | 0±0         |
| Fibrinogen alpha chain                          | 67.0     | 0.146±0.032 | 0.145±0.007 | 0.046±0.013 | 0.102±0.03  | 0.075±0.029 | 0.043±0.006 |
| Uncharacterized protein                         | 67       | 0±0         | 0±0         | 0.037±0.009 | 0.008±0.015 | 0±0         | 0±0         |
| Coagulation factor XII                          | 67.2     | 0.029±0.02  | 0±0         | 0±0         | 0±0         | 0±0         | 0±0         |
| Uncharacterized protein                         | 68.9     | 0.057±0.016 | 0.025±0.003 | 0.08±0.007  | 0.066±0.006 | 0.022±0.003 | 0.009±0.007 |
| Isoform LMW of<br>Kininogen-1                   | 69       | 0±0         | 0.058±0.019 | 0.018±0.012 | 0.041±0.015 | 0.036±0.014 | 0.033±0.014 |
| Kininogen-2                                     | 69       | 0±0         | 0.058±0.019 | 0.018±0.012 | 0.066±0.018 | 0.058±0.016 | 0.046±0.015 |
| Serum albumin                                   | 69.2     | 0.236±0.057 | 0.165±0.042 | 0.195±0.044 | 0.23±0.028  | 0.167±0.041 | 0.181±0.021 |
| Prothrombin                                     | 70.5     | 0.139±0.077 | 0.041±0.014 | 0.105±0.013 | 0.024±0.006 | 0.014±0.018 | 0±0         |
| Uncharacterized protein                         | 71.4     | 0.018±0.017 | 0±0         | 0±0         | 0±0         | 0±0         | 0±0         |
| Uncharacterized protein                         | 73.2     | 0.018±0.031 | 0±0         | 0±0         | 0±0         | 0±0         | 0±0         |
| Uncharacterized protein<br>(Fragment)           | 74       | 0±0         | 0.031±0.01  | 0.033±0.013 | 0.038±0.01  | 0.02±0.003  | 0.03±0.012  |
| Uncharacterized protein<br>(Fragment)           | 74.7     | 0.009±0.008 | 0±0         | 0±0         | 0±0         | 0±0         | 0±0         |
| Coagulation factor XIII, B                      | 75.1     | 0.009±0.015 | 0±0         | 0.057±0.014 | 0.015±0.016 | 0.013±0.017 | 0.017±0.012 |
| Fibulin-1                                       | 77       | 0±0         | 0.015±0.011 | 0.128±0.002 | 0.096±0.016 | 0.052±0.013 | 0.025±0.007 |
| Uncharacterized protein<br>(Fragment)           | 78       | 0±0         | 0.051±0.025 | 0.079±0.022 | 0.058±0.039 | 0.058±0.014 | 0.021±0.013 |
| Gelsolin                                        | 80.7     | 0.227±0.104 | 0.135±0.022 | 0.266±0.032 | 0.225±0.013 | 0.149±0.042 | 0.107±0.022 |
| PLG protein                                     | 81.5     | 0.032±0.004 | 0.007±0.009 | 0.053±0.005 | 0.042±0.012 | 0.018±0.002 | 0.028±0.002 |
| Uncharacterized protein                         | 83       | 0±0         | 0±0         | 0±0         | 0.007±0.007 | 0±0         | 0.008±0.009 |
| Coagulation factor XIII A<br>chain              | 83       | 0±0         | 0.034±0.013 | 0.022±0.002 | 0.021±0.019 | 0.012±0.009 | 0.023±0.003 |
| Heat shock protein HSP<br>90-alpha              | 85       | 0±0         | 0±0         | 0±0         | 0.007±0.007 | 0±0         | 0.008±0.009 |
| Complement factor B                             | 85.3     | 0.061±0.028 | 0±0         | 0.065±0.006 | 0±0         | 0±0         | 0±0         |
| Uncharacterized protein                         | 86.5     | 0.008±0.007 | 0±0         | 0±0         | 0±0         | 0±0         | 0±0         |
| Periostin variant 7                             | 86.8     | 0.008±0.007 | 0±0         | 0±0         | 0±0         | 0±0         | 0±0         |
| Plasminogen                                     | 91       | 0±0         | 0.013±0.008 | 0.074±0.011 | 0.05±0.019  | 0.022±0.005 | 0.028±0.006 |
| Uncharacterized protein                         | 93       | 0±0         | 0.049±0.02  | 0±0         | 0.024±0.012 | 0.005±0.007 | 0.031±0.02  |
| Elongation factor 2                             | 95.3     | 0.014±0.01  | 0±0         | 0±0         | 0.024±0.012 | 0.016±0.002 | 0.003±0.004 |
| Inter-alpha-trypsin<br>inhibitor heavy chain H3 | 100      | 0±0         | 0.011±0.009 | 0.067±0.024 | 0.011±0.008 | 0±0         | 0.006±0.004 |
| Inter-alpha-trypsin<br>inhibitor heavy chain H1 | 101.2    | 0.006±0.011 | 0±0         | 0.085±0.017 | 0.051±0.006 | 0.01±0.008  | 0±0         |
| Inter-alpha-trypsin<br>inhibitor heavy chain H4 | 101.5    | 0.322±0.013 | 0.101±0.05  | 0.181±0.032 | 0.112±0.03  | 0.059±0.015 | 0.035±0.011 |
| Complement C4                                   | 102      | 0±0         | 0.056±0.02  | 0.066±0.009 | 0.084±0.034 | 0.029±0.013 | 0.028±0.004 |

| Proteins                                               | MW<br>(kDa) | Porous (nm) |             |             | Dense (nm)  |             |             |
|--------------------------------------------------------|-------------|-------------|-------------|-------------|-------------|-------------|-------------|
|                                                        |             | 70          | 850         | 85          | 250         | 500         | 900         |
| (Fragments)                                            |             |             |             |             |             |             |             |
| Inter-alpha-trypsin inhibitor heavy chain H2           | 106.1       | 0.16±0.084  | 0.032±0.004 | 0.168±0.029 | 0.08±0.013  | 0.052±0.003 | 0.042±0.016 |
| Uncharacterized protein                                | 108.6       | 0.006±0.01  | 0.005±0.009 | 0.023±0.005 | 0±0         | 0±0         | 0±0         |
| Uncharacterized protein                                | 110.1       | 0.006±0.005 | 0±0         | 0±0         | 0±0         | 0±0         | 0±0         |
| Uncharacterized protein                                | 118.8       | 0.005±0.005 | 0±0         | 0±0         | 0±0         | 0±0         | 0±0         |
| Thrombospondin-1                                       | 129.3       | 0.071±0.028 | 0.035±0.018 | 0.104±0.042 | 0.105±0.018 | 0.066±0.006 | 0.064±0.003 |
| Complement factor H                                    | 140.3       | 0.037±0.02  | 0.069±0.03  | 0.127±0.018 | 0.126±0.018 | 0.093±0.007 | 0.048±0.007 |
| Lipid phosphate phosphatase-related protein type 2     | 144         | 0±0         | 0.012±0.009 | 0±0         | 0.008±0.006 | 0±0         | 0±0         |
| Uncharacterized protein                                | 153.8       | 0.004±0.007 | 0±0         | 0±0         | 0±0         | 0±0         | 0±0         |
| Alpha-2-macroglobulin                                  | 167.5       | 0.129±0.025 | 0.078±0.016 | 0.095±0.031 | 0.085±0.007 | 0.036±0.013 | 0.034±0.012 |
| Uncharacterized protein (Fragment)                     | 173.9       | 0.135±0.082 | 0.099±0.013 | 0.131±0.022 | 0.092±0.007 | 0.052±0.008 | 0.011±0.008 |
| Uncharacterized protein                                | 185.7       | 0.004±0.003 | 0±0         | 0±0         | 0±0         | 0±0         | 0±0         |
| Complement C3                                          | 187.0       | 0.059±0.027 | 0.018±0.002 | 0.174±0.008 | 0.103±0.002 | 0.051±0.026 | 0.019±0.008 |
| Uncharacterized protein                                | 192.6       | 0.186±0.026 | 0.104±0.016 | 0.134±0.039 | 0.103±0.014 | 0.062±0.005 | 0.028±0.008 |
| Coagulation factor V                                   | 222.1       | 0.009±0.015 | 0.003±0.003 | 0.008±0.006 | 0.01±0.006  | 0.007±0.001 | 0.001±0.002 |
| Uncharacterized protein                                | 227.0       | 0.003±0.005 | 0±0         | 0±0         | 0.008±0.008 | 0.007±0.006 | 0.001±0.002 |
| Cumulus cell-specific fibronectin 1 transcript variant | 249.0       | 0.037±0.016 | 0±0         | 0±0         | 0±0         | 0±0         | 0±0         |
| Uncharacterized protein (Fragment)                     | 270.6       | 0.005±0.004 | 0.015±0.003 | 0.025±0.009 | 0.042±0.005 | 0.035±0.013 | 0.013±0.007 |
| Fibronectin                                            | 272         | 0±0         | 0.013±0.007 | 0.023±0.006 | 0.017±0.007 | 0.009±0.002 | 0.004±0     |
| Uncharacterized protein                                | 281         | 0±0         | 0±0         | 0±0         | 0.008±0.001 | 0.002±0.002 | 0±0         |
| Uncharacterized protein                                | 342.2       | 0.002±0.004 | 0.002±0.002 | 0.02±0.007  | 0.018±0.003 | 0.012±0.003 | 0.007±0.002 |
| Uncharacterized protein                                | 516         | 0±0         | 0±0         | 0.042±0.009 | 0.02±0.005  | 0.005±0.001 | 0.007±0.005 |
